# Supplementary material for: Analgesic and Anti-Inflammatory Effects of the Synthetic Neurosteroid Analogue BNN27 during CFA-Induced Hyperalgesia
Source: MDPI journal article supplement (doi:10.3390/biomedicines9091185), 2021-09-09
Supplement: s1 [file s1]

CFA-injected paws exhibit decreased paw withdrawal latency compared to non-injected paws

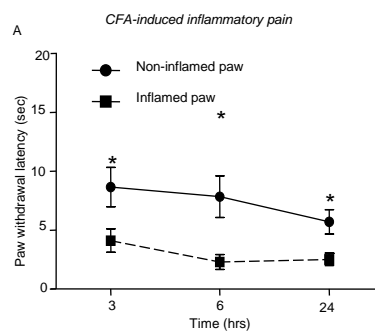

Repeated injections of BNN27 100 mg/kg after the induction of inflammation did not have any effect on paw withdrawal latency

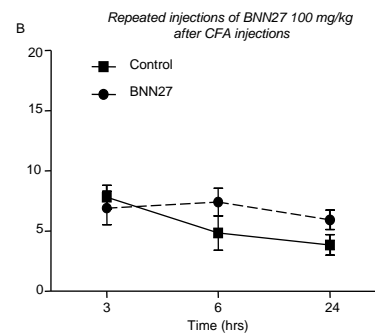

Single injection of BNN27 100 mg/kg after the induction of inflammation did not have any effect on paw withdrawal latency

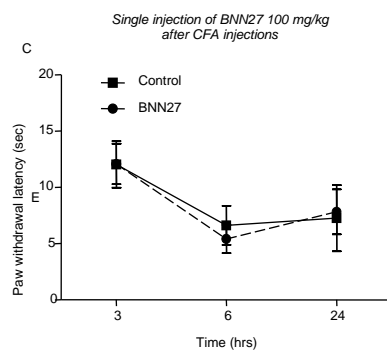

BNN27 administration did not change IL-1 $\beta$  protein levels at any time point and route of administration examined

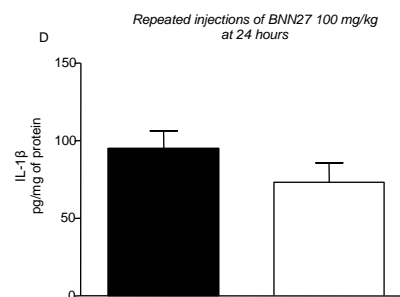

Serum corticosterone levels remained unchanged following repeated injections of BNN27 100 mg/kg at 6 hours

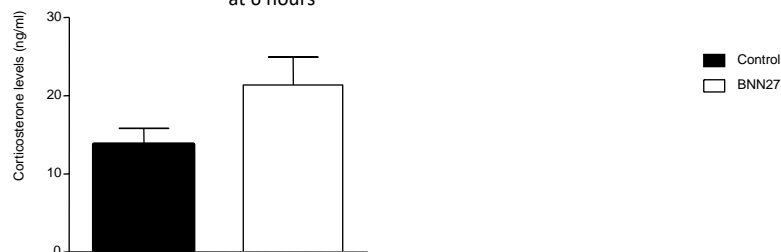

Figure S1: Effect of different doses of BNN27 on paw withdrawal latencies, IL-1 $\beta$  and corticosterone levels (6hrs).

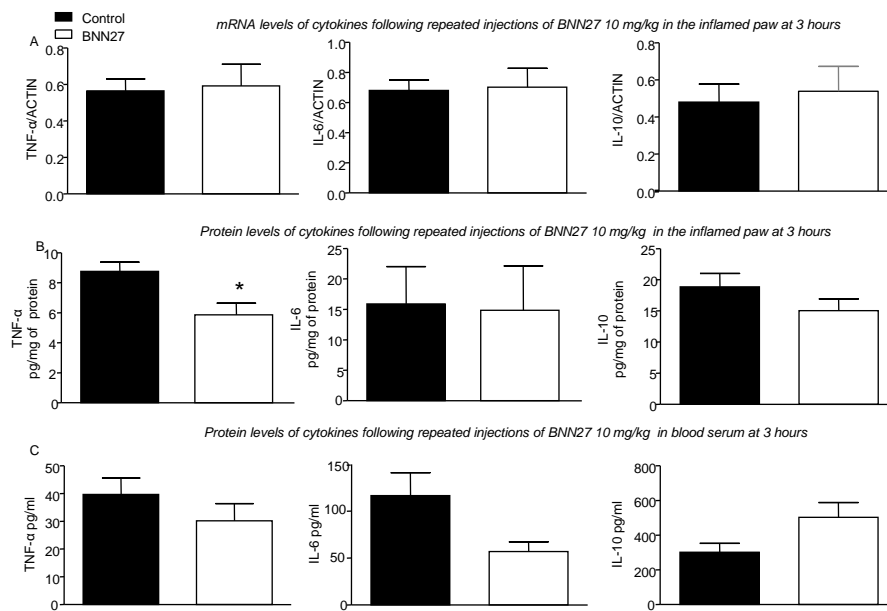

Figure S2: Effect of repeated injections of BNN27 10 mg/Kg on cytokine levels in the inflamed paw and blood at 3 hours post CFA injections.

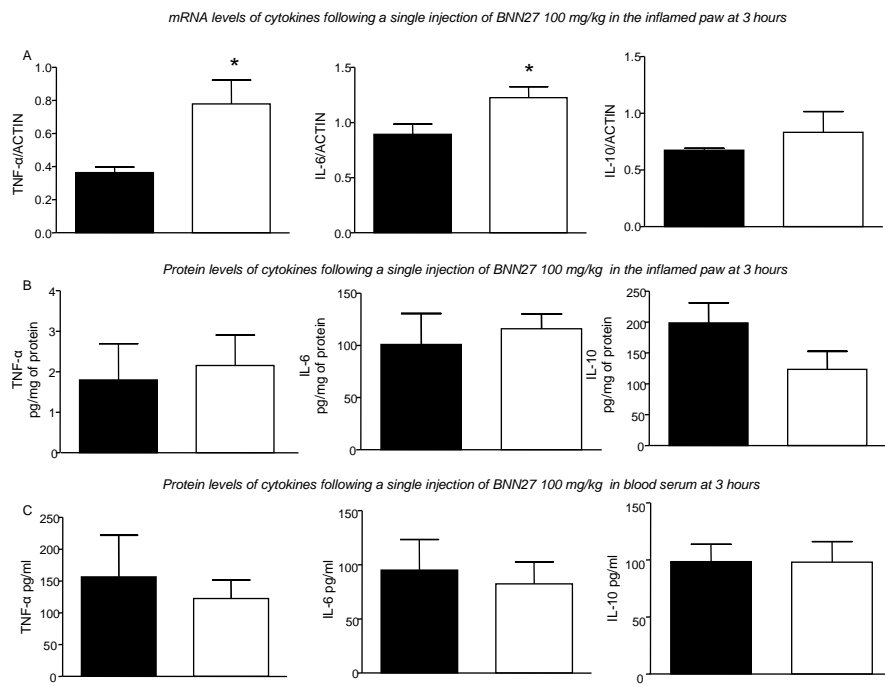

Figure S3: Effect of a single injection of BNN27 100 mg/kg on cytokine levels in the inflamed paw and blood at 3 hours post CFA injections

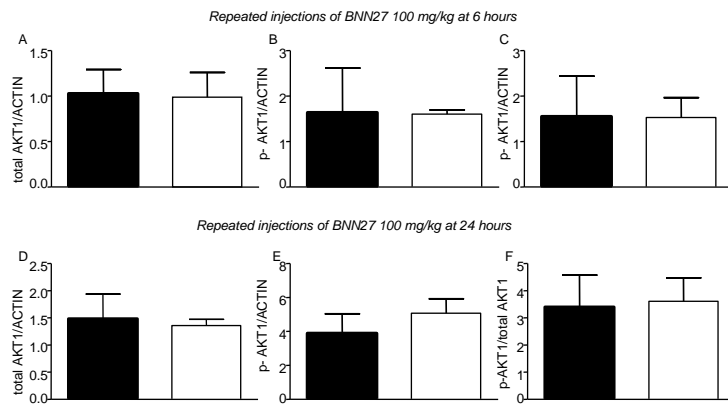

Figure S4: Repeated injections of BNN27 100 mg/kg did not affect AKT1 signaling pathway

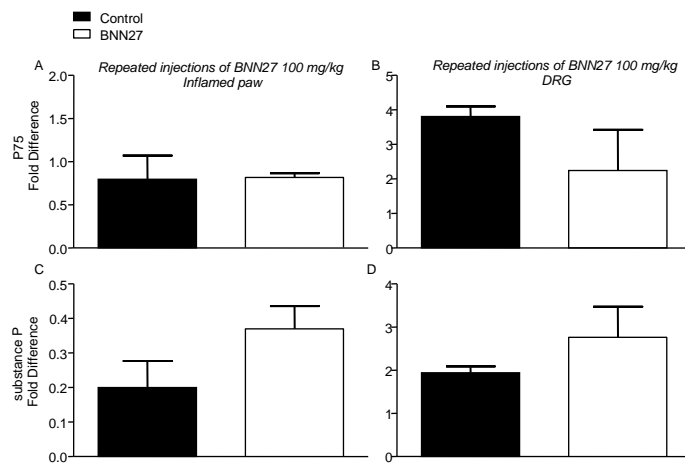

Figure S5: mRNA levels of TrkA receptor p75 and substance p remained unaffected by BNN27 treatment

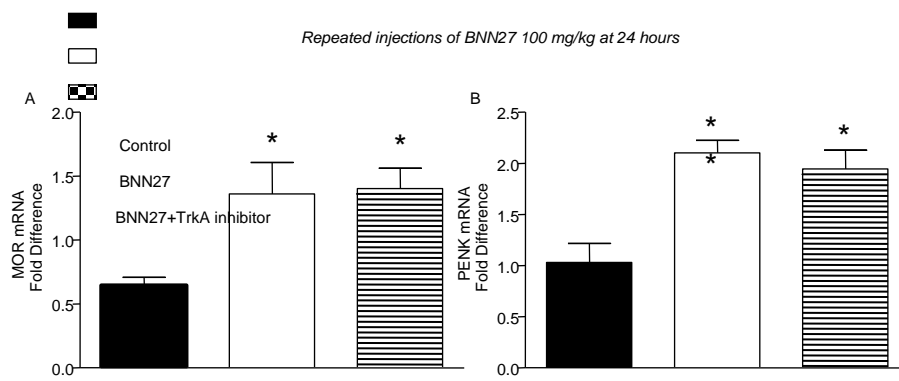

Figure S6: Administration of BNN27 100 mg/kg simultaneously with TrkA inhibitor did not affect  $\mu$ -opioid receptor and PENK mRNA compared to mice treated only with BNN27
